# Supplementary material for: One Year of the COVID-19 Pandemic in Dental Medical Facilities in Germany: A Questionnaire-Based Analysis
Source: MDPI journal article supplement (doi:10.3390/ijerph19010175), 2021-12-24
Supplement: s1 [file s1]

## 1. Basic data

- 1.1 Is the location of your private practice/department in Bavaria?
- Yes
  - No
- 1.1 What are the first two digits of your postcode?  
FIGURE FIELD
- 1.2 Please enter below the first two letters of your mother's maiden name and the first two letters of your father's first name. This code serves to better allocate the two-sided questionnaire to each other and does not allow any conclusions to be drawn about your person/private practice/department:  
FOUR DIGITS
- 1.3 Type of facility:
- Clinic (continue with 1.4.1)
  - Private practice (continue with 1.5.1)
- 1.4.1 What is the level of care classification of your hospital?
- Primary care
  - Secondary care
  - Tertiary care
  - Not specified
- 1.4.2 How many beds does your hospital have?
- Under 100 beds
  - 100 to < 200 beds
  - 200 to < 500 beds
  - 500 beds to < 800 beds
  - Over 800 beds
- 1.5.1 How many notes do you have per quarter?
- Under 600
  - 600 to < 1200
  - 1800 to < 2400
  - Over 2400
- 1.6 How many employees work in the respective department (e.g. endoscopy department/ entire private practice)?  
FIGURE FIELD
- 1.7 Related to question 1.6: What is the full-time position equivalent (cumulative)?  
FIGURE FIELD
- 1.8 Which specialization do you belong to?
- Gastroenterology/Endoscopy
  - ORL
  - Dentistry
  - OMS
  - Other: \_\_\_\_\_

## 2. Employee status since the start of the pandemic

- 2.1 How many employees had already been diagnosed with COVID-19?  
NUMBER FIELD
- 2.2 How many of them are most likely to have caught it in the following situations?
- | In the private environment | At work (during interventions) | At work (other patient contact, e.g. registration) | At work (without patient contact, e.g. during the break) | Unclear origin of infection |
|----------------------------|--------------------------------|----------------------------------------------------|----------------------------------------------------------|-----------------------------|
| FIGURE FIELD               | FIGURE FIELD                   | FIGURE FIELD                                       | FIGURE FIELD                                             | FIGURE FIELD                |
- 2.3 How many employees in total were already in quarantine?  
FIGURE FIELD
- 2.4 How many employees were quarantined due to job-related exposure?  
FIGURE FIELD
- 2.5 Have you had to cancel procedures due to pandemic-related staff shortages?
- Yes
  - No
- 2.6 Have you screened yourself and/or your staff for COVID-19 (testing in the asymptomatic without specific cause)?
- Yes (continue with 2.7.1)
  - No (continue with 2.8)
- 2.7.1 What was the primary method?
- Antibody test

- PCR
  - Antigen test
  - other
- 2.7.2 Have you detected positive employees as part of a screening program?
- Yes
  - No
- 2.7.3 Did the screening have any consequences?
- Yes
  - No
- 2.8 What do you estimate the vaccination readiness among your clinic/private practice staff?
- up to < 20 %
  - 20 % to < 40
  - 40 % to < 60
  - 60 % to < 80
  - 80% to 100%

### 3a. Procedures (Gastroenterology/Endoscopy specific)

- 3a.1 How many procedures do you perform on average per year?  
FIGURE FIELD
- 3a.2 What percentage of these are endoscopic procedures in the upper gastrointestinal tract (gastroscopy, ERCP, endosonography, etc.) or bronchoscopies?
- up to < 20 %
  - 20 % to < 40
  - 40 % to < 60
  - 60 % to < 80
  - 80% to 100%
- 3a.3 What percentage of these are endoscopic procedures in the lower gastrointestinal tract (colonoscopy, sigmoidoscopy, etc.)?
- 0 to < 20 %
  - 20 % to < 40
  - 40 % to < 60
  - 60 % to < 80
  - 80% to 100%
- 3a.4 How many examinations did you perform on average per working day in your private practice/department before the pandemic started?  
FIGURE FIELD
- 3a.5 How many treatment rooms does your department/private practice have?  
FIGURE FIELD
- 3a.6 What is the average size of your treatment rooms?
- < 10 sqm
  - 10 to < 15 sqm
  - 15 to < 20 sqm
  - 20 to < 25 sqm
  - > 25 sqm
- 3a.7 How many employees are typically in the room for a procedure?  
FIGURE FIELD
- 3a.8 Are ventilation systems (ventilation and air-conditioning systems, fans, mobile air-conditioning units without air filters, fan heaters, etc.) installed?
- Yes (continue with 3a.8.1)
  - No (continue with 4.1)
  - Unknown (continue with 4.1)
- 3a.8.1 If yes: Which ventilation systems are mainly installed?
- Air handling units (AHU) in recirculation mode
  - Air handling unit (AHU) with air filter (e.g. HEPA filter) with / without recirculation mode
  - Fans / mobile air conditioners without air filter / fan heaters
  - Other: \_\_\_\_\_
  - Unknown

### 3b. Procedures (ORL specific)

- 3b.1 How many endoscopic procedures do you perform on average per year?  
NUMBER FIELD

- 3b.2 What percentage of these are flexible endoscopies?
- up to < 20 %
  - 20 % to < 40
  - 40 % to < 60
  - 60 % to < 80
  - 80% to 100%
- 3b.3 What percentage of these are laryngeal endoscopies?
- 0 to < 20 %
  - 20 % to < 40
  - 40 % to < 60
  - 60 % to < 80
  - 80% to 100%
- 3b.4 How many percent of these are microlaryngoscopies under general anaesthesia?
- 0 to < 20 %
  - 20 % to < 40
  - 40 % to < 60
  - 60 % to < 80
  - 80 % to 100%
- 3b.5 How many examinations did you perform on average per working day in your private practice/department before the pandemic started?  
FIGURE FIELD
- 3b.6 How many treatment rooms does your department/private practice have?  
FIGURE FIELD
- 3b.7 What is the average size of your treatment rooms?
- < 10 sqm
  - 10 to < 15 sqm
  - 15 to < 20 sqm
  - 20 to < 25 sqm
  - > 25 sqm
- 3b.8 How many employees are typically in the room for a procedure?  
FIGURE FIELD
- 3b.9 Are ventilation systems (ventilation and air-conditioning systems, fans, mobile air-conditioning units without air filters, fan heaters, etc.) installed?
- Yes (continue with 3b.9.1)
  - No (continue with 4.1)
  - Unknown (continue with 4.1)
- 3b.9.1 If yes: Which ventilation systems are mainly installed?
- Air handling units (AHU) in recirculation mode
  - Air handling unit (AHU) with air filter (e.g. HEPA filter) with / without recirculation mode
  - Fans / mobile air conditioners without air filter / fan heaters
  - Other: \_\_\_\_\_
  - Unknown

### 3c. Procedures (Dentistry specific)

- 3c.1 What is the specialization of your institution? (Multiple answers possible)
- Implantology
  - Periodontology
  - Prosthetic dentistry
  - Pediatric dentistry
  - Restorative dentistry
  - Endodontics
  - Orthodontics
  - Other: \_\_\_\_\_
- 3c.2 What is the percentage of aerosol-generating procedures (professional teeth cleaning, etc.) performed in your private practice/department?
- up to < 20 %
  - 20 % to < 40
  - 40 % to < 60
  - 60 % to < 80
  - 80% to 100%
- 3c.3 What is the percentage of non-aerosol-generating procedures performed in your private practice/department?

- 0 to < 20 %
  - 20 % to < 40
  - 40 % to < 60
  - 60 % to < 80
  - 80% to 100%
- 3c.4 What is the percentage of procedures performed using a rubber dam?
- 0 to < 20 %
  - 20 % to < 40
  - 40 % to < 60
  - 60 % to < 80
  - 80 % to 100%
- 3c.5 How many examinations did you perform on average per working day in your private practice/department before the pandemic started?  
FIGURE FIELD
- 3c.6 How many treatment rooms does your department/private practice have?  
FIGURE FIELD
- 3c.7 What is the average size of your treatment rooms?
- < 10 sqm
  - 10 to < 15 sqm
  - 15 to < 20 sqm
  - 20 to < 25 sqm
  - > 25 sqm
- 3c.8 How many employees are typically in the room for a procedure?  
FIGURE FIELD
- 3c.9 Are ventilation systems (ventilation and air-conditioning systems, fans, mobile air-conditioning units without air filters, fan heaters, etc.) installed?
- Yes (continue with 3c.9.1)
  - No (continue with 4.1)
  - Unknown (continue with 4.1)
- 3c.9.1 If yes: Which ventilation systems are mainly installed?
- Air handling units (AHU) in recirculation mode
  - Air handling unit (AHU) with air filter (e.g. HEPA filter) with / without recirculation mode
  - Fans / mobile air conditioners without air filter / fan heaters
  - Other: \_\_\_\_\_
  - Unknown

### 3d. Procedures (OMS specific)

- 3d.1 What is the specialization of your institution? (Multiple answers possible)
- Implantology
  - Orthognathic surgery / dysgnathia surgery
  - Traumatology
  - Tumor surgery
  - Other: \_\_\_\_\_
- 3d.2 What is the percentage of tooth extractions performed under intubation anaesthesia?
- up to < 20 %
  - 20 % to < 40
  - 40 % to < 60
  - 60 % to < 80
  - 80% to 100%
- 3d.3 What is the percentage of tooth extractions performed under local anaesthesia?
- up to < 20 %
  - 20 % to < 40
  - 40 % to < 60
  - 60 % to < 80
  - 80% to 100%
- 3d.4 What is the percentage of procedures performed extraorally?
- up to < 20 %
  - 20 % to < 40
  - 40 % to < 60
  - 60 % to < 80
  - 80% to 100%
- 3d.5 What is the percentage of procedures performed intraorally?
- up to < 20 %

- 20 % to < 40
  - 40 % to < 60
  - 60 % to < 80
  - 80% to 100%
- 3d.6 What is the percentage of procedures performed in the following locations?
- | In the operating room? | In the intervention room? | In the dental chair? |
|------------------------|---------------------------|----------------------|
| • up to < 20 %         | • up to < 20 %            | • up to < 20 %       |
| • 20 % to < 40         | • 20 % to < 40            | • 20 % to < 40       |
| • 40 % to < 60         | • 40 % to < 60            | • 40 % to < 60       |
| • 60 % to < 80         | • 60 % to < 80            | • 60 % to < 80       |
| • 80% to 100%          | • 80% to 100%             | • 80% to 100%        |
- 3d.7 What is the percentage of aerosol-generating procedures performed in your private practice/department?
- up to < 20 %
  - 20 % to < 40
  - 40 % to < 60
  - 60 % to < 80
  - 80% to 100%
- 3d.8 What is the percentage of non-aerosol-generating procedures performed in your private practice/department?
- 0 to < 20 %
  - 20 % to < 40
  - 40 % to < 60
  - 60 % to < 80
  - 80% to 100%
- 3d.9 What is the percentage of procedures performed using a rubber dam?
- 0 to < 20 %
  - 20 % to < 40
  - 40 % to < 60
  - 60 % to < 80
  - 80% to 100%
- 3d.10 How many examinations did you perform on average per working day in your private practice/department before the pandemic started?  
FIGURE FIELD
- 3d.11 How many treatment rooms does your department/private practice have?  
FIGURE FIELD
- 3d.12 What is the average size of your treatment rooms?
- < 10 sqm
  - 10 to < 15 sqm
  - 15 to < 20 sqm
  - 20 to < 25 sqm
  - > 25 sqm
- 3d.13 How many employees are typically in the room for a procedure?  
FIGURE FIELD
- 3d.14 Are ventilation systems (ventilation and air-conditioning systems, fans, mobile air-conditioning units without air filters, fan heaters, etc.) installed?
- Yes (continue with 3d.14.1)
  - No (continue with 4.1)
  - Unknown (continue with 4.1)
- 3d.14.1 If yes: Which ventilation systems are mainly installed?
- Air handling units (AHU) in recirculation mode
  - Air handling unit (AHU) with air filter (e.g. HEPA filter) with / without recirculation mode
  - Fans / mobile air conditioners without air filter / fan heaters
  - Other: \_\_\_\_\_
  - Unknown

#### 4. Protective measures in 2<sup>nd</sup>, 3<sup>rd</sup> and 4<sup>th</sup> quarter of 2020

- 4.1 Have you changed your prophylactic protection measures because of the pandemic?
- Yes
  - No
- 4.2 Have you and your employees used/are you and your employees using mouth and nose protection?
- | In the 2 <sup>nd</sup> quarter of 2020 (04.-06.2020) | In the 3 <sup>rd</sup> quarter of 2020 (07.-09.2020) | In the 4 <sup>th</sup> quarter of 2020 (10.-12.2020) |
|------------------------------------------------------|------------------------------------------------------|------------------------------------------------------|
| • Always                                             | • Always                                             | • Always                                             |
| • Very frequently                                    | • Very frequently                                    | • Very frequently                                    |

- |  |                                                                                               |                                                                                               |                                                                                               |
|--|-----------------------------------------------------------------------------------------------|-----------------------------------------------------------------------------------------------|-----------------------------------------------------------------------------------------------|
|  | <ul style="list-style-type: none"> <li>Occasionally</li> <li>Rarely</li> <li>Never</li> </ul> | <ul style="list-style-type: none"> <li>Occasionally</li> <li>Rarely</li> <li>Never</li> </ul> | <ul style="list-style-type: none"> <li>Occasionally</li> <li>Rarely</li> <li>Never</li> </ul> |
|--|-----------------------------------------------------------------------------------------------|-----------------------------------------------------------------------------------------------|-----------------------------------------------------------------------------------------------|
- 4.3 Have you and your employees used/are you and your employees using FFP2/N95 or FFP3 mask?  
In the 2<sup>nd</sup> quarter of 2020 (04.-06.2020)      In the 3<sup>rd</sup> quarter of 2020 (07.-09.2020)      In the 4<sup>th</sup> quarter of 2020 (10.-12.2020)
- |                                                                                                                                        |                                                                                                                                        |                                                                                                                                        |
|----------------------------------------------------------------------------------------------------------------------------------------|----------------------------------------------------------------------------------------------------------------------------------------|----------------------------------------------------------------------------------------------------------------------------------------|
| <ul style="list-style-type: none"> <li>Always</li> <li>Very frequently</li> <li>Occasionally</li> <li>Rarely</li> <li>Never</li> </ul> | <ul style="list-style-type: none"> <li>Always</li> <li>Very frequently</li> <li>Occasionally</li> <li>Rarely</li> <li>Never</li> </ul> | <ul style="list-style-type: none"> <li>Always</li> <li>Very frequently</li> <li>Occasionally</li> <li>Rarely</li> <li>Never</li> </ul> |
|----------------------------------------------------------------------------------------------------------------------------------------|----------------------------------------------------------------------------------------------------------------------------------------|----------------------------------------------------------------------------------------------------------------------------------------|
- 4.4 Have you and your employees used/are you and your employees using water-repellent protective gowns?  
In the 2<sup>nd</sup> quarter of 2020 (04.-06.2020)      In the 3<sup>rd</sup> quarter of 2020 (07.-09.2020)      In the 4<sup>th</sup> quarter of 2020 (10.-12.2020)
- |                                                                                                                                        |                                                                                                                                        |                                                                                                                                        |
|----------------------------------------------------------------------------------------------------------------------------------------|----------------------------------------------------------------------------------------------------------------------------------------|----------------------------------------------------------------------------------------------------------------------------------------|
| <ul style="list-style-type: none"> <li>Always</li> <li>Very frequently</li> <li>Occasionally</li> <li>Rarely</li> <li>Never</li> </ul> | <ul style="list-style-type: none"> <li>Always</li> <li>Very frequently</li> <li>Occasionally</li> <li>Rarely</li> <li>Never</li> </ul> | <ul style="list-style-type: none"> <li>Always</li> <li>Very frequently</li> <li>Occasionally</li> <li>Rarely</li> <li>Never</li> </ul> |
|----------------------------------------------------------------------------------------------------------------------------------------|----------------------------------------------------------------------------------------------------------------------------------------|----------------------------------------------------------------------------------------------------------------------------------------|
- 4.5 Have you and your employees used/are you and your employees using glasses or protective goggles/visors?  
In the 2<sup>nd</sup> quarter of 2020 (04.-06.2020)      In the 3<sup>rd</sup> quarter of 2020 (07.-09.2020)      In the 4<sup>th</sup> quarter of 2020 (10.-12.2020)
- |                                                                                                                                        |                                                                                                                                        |                                                                                                                                        |
|----------------------------------------------------------------------------------------------------------------------------------------|----------------------------------------------------------------------------------------------------------------------------------------|----------------------------------------------------------------------------------------------------------------------------------------|
| <ul style="list-style-type: none"> <li>Always</li> <li>Very frequently</li> <li>Occasionally</li> <li>Rarely</li> <li>Never</li> </ul> | <ul style="list-style-type: none"> <li>Always</li> <li>Very frequently</li> <li>Occasionally</li> <li>Rarely</li> <li>Never</li> </ul> | <ul style="list-style-type: none"> <li>Always</li> <li>Very frequently</li> <li>Occasionally</li> <li>Rarely</li> <li>Never</li> </ul> |
|----------------------------------------------------------------------------------------------------------------------------------------|----------------------------------------------------------------------------------------------------------------------------------------|----------------------------------------------------------------------------------------------------------------------------------------|
- 4.6 Did/Do you and your staff air the treatment room(s) between procedures?  
In the 2<sup>nd</sup> quarter of 2020 (04.-06.2020)      In the 3<sup>rd</sup> quarter of 2020 (07.-09.2020)      In the 4<sup>th</sup> quarter of 2020 (10.-12.2020)
- |                                                                                                                                        |                                                                                                                                        |                                                                                                                                        |
|----------------------------------------------------------------------------------------------------------------------------------------|----------------------------------------------------------------------------------------------------------------------------------------|----------------------------------------------------------------------------------------------------------------------------------------|
| <ul style="list-style-type: none"> <li>Always</li> <li>Very frequently</li> <li>Occasionally</li> <li>Rarely</li> <li>Never</li> </ul> | <ul style="list-style-type: none"> <li>Always</li> <li>Very frequently</li> <li>Occasionally</li> <li>Rarely</li> <li>Never</li> </ul> | <ul style="list-style-type: none"> <li>Always</li> <li>Very frequently</li> <li>Occasionally</li> <li>Rarely</li> <li>Never</li> </ul> |
|----------------------------------------------------------------------------------------------------------------------------------------|----------------------------------------------------------------------------------------------------------------------------------------|----------------------------------------------------------------------------------------------------------------------------------------|
- 4.7 Are you likely to change the prophylactic protective measures of your employees after approval of a vaccine against COVID-19?
- Yes
  - No
  - Unknown

## 5. Pre-interventional testing

- 5.1 Did/Do you pre-interventionally test your patients for COVID-19 or request/demand a current (externally performed) test? (Multiple answers possible)
- We tested/test pre-interventionally for SARS-CoV2 (continue with 5.1.1)
  - We requested/request an actual test for SARS-CoV2 (continue with 5.1.2)
  - We used/are using a different testing procedure for SARS-CoV2.
  - We did not/do not perform pre-interventional testing for SARS-CoV2.
- 5.1.1 How long prior to the intervention was/is testing for COVID-19 mainly performed?  
In the 2<sup>nd</sup> quarter of 2020 (04.-06.2020)      In the 3<sup>rd</sup> quarter of 2020 (07.-09.2020)      In the 4<sup>th</sup> quarter of 2020 (10.-12.2020)
- |                                                                                                                          |                                                                                                                          |                                                                                                                          |
|--------------------------------------------------------------------------------------------------------------------------|--------------------------------------------------------------------------------------------------------------------------|--------------------------------------------------------------------------------------------------------------------------|
| <ul style="list-style-type: none"> <li>&lt; 24h</li> <li>24 -&lt; 48h</li> <li>48h -&lt; 72h</li> <li>&gt;72h</li> </ul> | <ul style="list-style-type: none"> <li>&lt; 24h</li> <li>24 -&lt; 48h</li> <li>48h -&lt; 72h</li> <li>&gt;72h</li> </ul> | <ul style="list-style-type: none"> <li>&lt; 24h</li> <li>24 -&lt; 48h</li> <li>48h -&lt; 72h</li> <li>&gt;72h</li> </ul> |
|--------------------------------------------------------------------------------------------------------------------------|--------------------------------------------------------------------------------------------------------------------------|--------------------------------------------------------------------------------------------------------------------------|
- 5.1.2 In which time period prior to the procedure did/do the test have to take place?  
In the 2<sup>nd</sup> quarter of 2020 (04.-06.2020)      In the 3<sup>rd</sup> quarter of 2020 (07.-09.2020)      In the 4<sup>th</sup> quarter of 2020 (10.-12.2020)
- |                                                                                                                                                |                                                                                                                                                |                                                                                                                                                |
|------------------------------------------------------------------------------------------------------------------------------------------------|------------------------------------------------------------------------------------------------------------------------------------------------|------------------------------------------------------------------------------------------------------------------------------------------------|
| <ul style="list-style-type: none"> <li>1 day (24h)</li> <li>2 days (48h)</li> <li>3 days (72h)</li> <li>4 days (96h)</li> <li>Older</li> </ul> | <ul style="list-style-type: none"> <li>1 day (24h)</li> <li>2 days (48h)</li> <li>3 days (72h)</li> <li>4 days (96h)</li> <li>Older</li> </ul> | <ul style="list-style-type: none"> <li>1 day (24h)</li> <li>2 days (48h)</li> <li>3 days (72h)</li> <li>4 days (96h)</li> <li>Older</li> </ul> |
|------------------------------------------------------------------------------------------------------------------------------------------------|------------------------------------------------------------------------------------------------------------------------------------------------|------------------------------------------------------------------------------------------------------------------------------------------------|

5.2 Have you examined/treated suspected or known Covid-19 positive patients?

- Yes (continue with 5.3.1)
- No (continue with 6.1)

5.3.1 What is the number of examined/treated suspected cases?

FIGURE FIELD

5.3.2 What is the number of examined/treated COVID-19 positive patients?

FIGURE FIELD

## 6. Economic situation

6.1 What is the expected change in the number of procedures in 2020 compared to the previous year?

- Increase by more than 50%
- Increase by less than 50%
- Roughly constant
- Decrease by less than 50%
- Decrease by more than 50%

6.2 What is your estimated turnover development in 2020 compared to the previous year?

- Increase by more than 50%
- Increase by less than 50%
- Roughly constant
- Decrease by less than 50%
- Decrease by more than 50%

6.3 What is the trend in your employee number since the beginning of the pandemic (cumulative number of full-time positions)?

- Increase
- Roughly constant
- Decrease

6.4 Was this trend directly caused by the pandemic?

- Strongly agree
- Agree
- Disagree
- Strongly disagree

6.5 Have you postponed/are you postponing procedures because of the pandemic?

In the 2<sup>nd</sup> quarter of 2020 (04.-06.2020)

- Never
- Cancellation of up to 50% of elective examinations
- Cancellation of more than 50% of elective examinations
- Cancellation of all elective examinations (continue with 6.5.1)

In the 3<sup>rd</sup> quarter of 2020 (07.-09.2020)

- Never
- Cancellation of up to 50% of elective examinations
- Cancellation of more than 50% of elective examinations
- Cancellation of all elective examinations (continue with 6.5.1)

In the 4<sup>th</sup> quarter of 2020 (10.-12.2020)

- Never
- Cancellation of up to 50% of elective examinations
- Cancellation of more than 50% of elective examinations
- Cancellation of all elective examinations (continue with 6.5.1)

6.5.1 What were/are the main causes for the postponement? (Multiple answers possible)

In the 2<sup>nd</sup> quarter of 2020 (04.-06.2020)

- Voluntary preventive
- Ordered by public health department
- Staff shortage
- Patient shortage

In the 3<sup>rd</sup> quarter of 2020 (07.-09.2020)

- Voluntary preventive
- Ordered by Health Department
- Staff shortage
- Patient shortage

In the 4<sup>th</sup> quarter of 2020 (10.-12.2020)

- Voluntary preventive
- Ordered by public health department
- Staff shortage
- Patient shortage

Additionally for private practices:

6.6 Do you have loss of earnings insurance?

- Yes
- No
- Unknown

## 7. Serological study

If 1.1 is answered with "Yes":

7.1 Do you want to participate in our antibody test study?

- Yes
- No
